# Supplementary material
Source: publisher site journal article supplement (https://spandidos-publications.com/966/downloadSupplementary)
Supplement: Supplementary file 1 [file downloadSupplementary]

Figure S1. Macro-dissection of tumor tissue in core needle biopsy specimen (A) HE staining of core needle biopsy specimen. Magnification, x40. (B) Sample prior to macro-dissection (nuclear staining with neutral red). Magnification, x40. (C) Sample after manual macro-dissection. Magnification, x40. HE, hematoxylin and eosin.

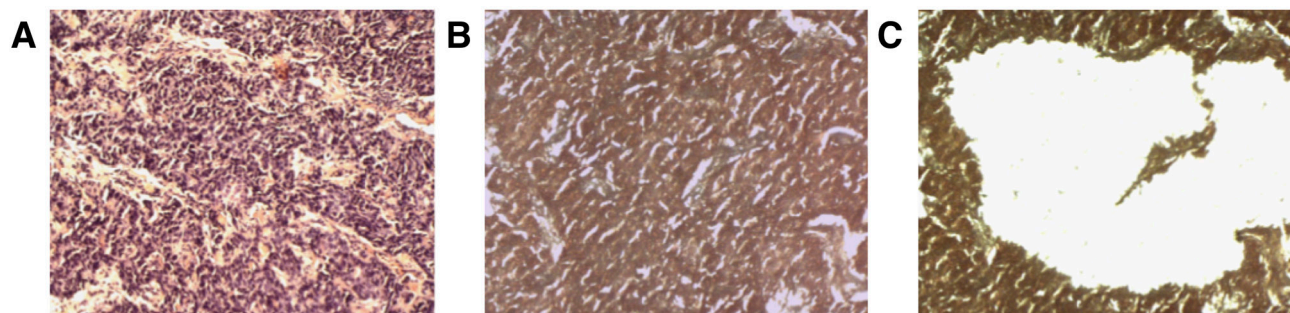

Figure S2. ROC curve of SPARC mRNA and pCR. Area under the curve 0.700. ROC, receiver operating characteristic; SPARC, secreted protein acidic and rich in cysteine; pCR, pathological complete response.

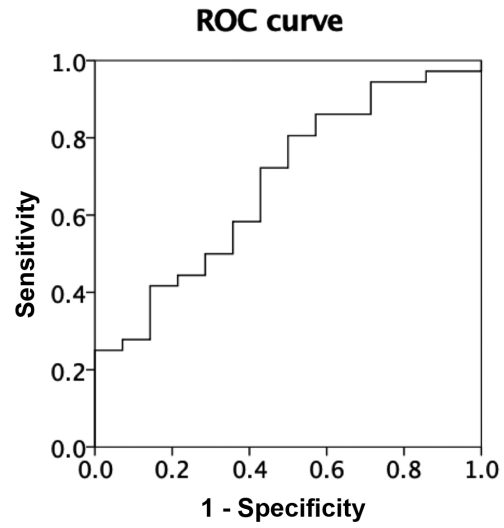

Table SI. List of assay IDs used for real-time PCR analysis.

| mRNA            | Assay ID      | Gene symbol | Gene name                                 |
|-----------------|---------------|-------------|-------------------------------------------|
| SPARC           | Hs00234160_m1 | SPARC       | Secreted protein acidic and cysteine rich |
| TS              | Hs00426586_m1 | TYMS        | Thymidylate synthetase                    |
| DPD             | Hs00559278_m1 | DPYD        | Dihydropyrimidine dehydrogenase           |
| MDR1            | Hs00184500_m1 | ABCB1       | ATP Binding Cassette Subfamily B Member 1 |
| MRP1            | Hs00219905_m1 | ABCC1       | ATP Binding Cassette Subfamily C Member 1 |
| TopoII $\alpha$ | Hs03063307_m1 | TOP2A       | DNA topoisomerase II alpha                |
| $\beta$ -actin  | Hs00357333_g1 | ACTB        | $\beta$ -Actin                            |
